# Supplementary material for: Cholesterol Acceptors Regulate the Lipidome of Macrophage Foam Cells
Source: PubMed Central journal article supplement (PMC6695943; doi:10.3390/ijms20153784), 2019-08-02
Supplement: ijms-20-03784-s001.pdf [file ijms-20-03784-s001.pdf]

## Supplementary Materials:

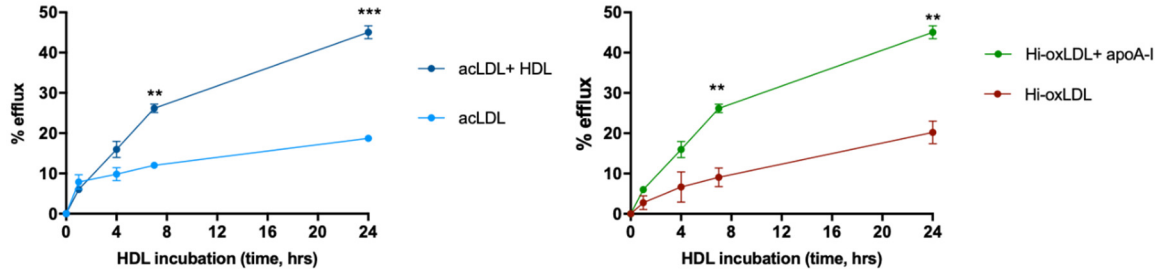

**Figure S1.** MPMs were loaded with  $^3\text{H}$ -cholesterol-coupled acLDL or hi-oxLDL. Cholesterol efflux was initiated with 50  $\mu\text{g}/\text{mL}$  of HDL. The percentage of cholesterol efflux compared to time 0 at each time point was calculated as described in the methods ( $n = 4$  per each treatment). The data were presented as mean  $\pm$  SEM.  $**p < 0.005$ ,  $***p < 0.0005$ .

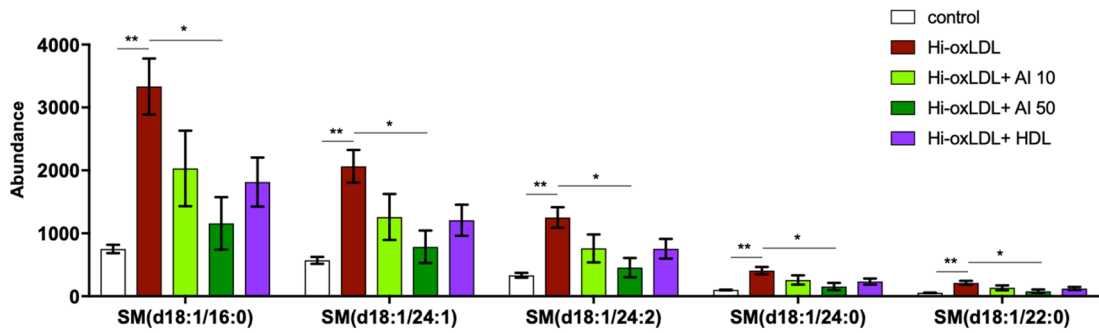

**Figure S2.** Top five most abundant sphingomyelin (SM) compounds in each treatment group. The values are ion abundance normalized to mg protein. The data were presented as mean  $\pm$  SEM ( $n = 4$  per group). Control versus hi-oxLDL,  $*p < 0.05$ ,  $**p < 0.005$ .

**Table S1.** All sphingomyelin (SM) compounds detected from untargeted lipidomics. SMs that were found in human endarterectomy but not in the radial artery [31] were colored in red. ( $n = 4$  per group).

| m/z         | Lipid                 | Control |       | Hi-oxLDL |        | Hi-oxLDL<br>+ AI 10 |        | Hi-oxLDL<br>+ AI 50 |        | Hi-oxLDL<br>+ HDL 50 |        |
|-------------|-----------------------|---------|-------|----------|--------|---------------------|--------|---------------------|--------|----------------------|--------|
|             |                       | Average | SEM   | Average  | SEM    | Average             | SEM    | Average             | SEM    | Average              | SEM    |
| 703.5748124 | <b>SM(d18:1/16:0)</b> | 752.53  | 65.91 | 3333.84  | 445.84 | 2031.61             | 600.97 | 1159.25             | 417.20 | 1813.97              | 389.87 |
| 813.6843568 | <b>SM(d18:1/24:1)</b> | 570.68  | 54.18 | 2065.40  | 260.37 | 1259.39             | 363.98 | 785.51              | 258.47 | 1208.92              | 246.02 |
| 811.6687076 | <b>SM(d18:1/24:2)</b> | 332.69  | 37.63 | 1251.40  | 163.33 | 761.02              | 222.23 | 454.41              | 153.45 | 756.00               | 156.08 |
| 815.700006  | <b>SM(d18:1/24:0)</b> | 100.31  | 6.02  | 407.88   | 58.61  | 258.61              | 74.43  | 154.70              | 55.49  | 234.23               | 47.76  |
| 787.6687076 | SM(d18:1/22:0)        | 55.11   | 3.08  | 212.80   | 30.84  | 134.20              | 38.96  | 79.93               | 28.45  | 123.28               | 25.55  |
| 725.5591632 | SM(d18:1/18:3)        | 8.81    | 1.56  | 74.35    | 15.71  | 41.61               | 12.74  | 20.12               | 8.01   | 33.28                | 8.59   |
| 689.5591632 | <b>SM(d18:1/15:0)</b> | 11.37   | 1.25  | 60.80    | 8.90   | 36.87               | 11.10  | 20.16               | 7.56   | 30.12                | 6.45   |
| 799.6687076 | SM(d18:1/23:1)        | 18.86   | 1.74  | 58.45    | 7.69   | 35.32               | 10.15  | 22.63               | 7.60   | 31.81                | 6.44   |
| 801.6843568 | SM(d18:1/23:0)        | 12.77   | 0.78  | 57.68    | 8.41   | 35.58               | 10.27  | 21.39               | 7.44   | 33.19                | 6.72   |
| 731.6061108 | SM(d18:1/18:0)        | 12.10   | 0.88  | 53.68    | 7.51   | 33.38               | 10.06  | 19.30               | 7.23   | 30.69                | 6.67   |
| 701.5591632 | <b>SM(d18:1/16:1)</b> | 9.05    | 1.23  | 46.66    | 6.19   | 27.15               | 8.29   | 16.57               | 5.69   | 23.08                | 4.96   |
| 785.6530584 | SM(d18:1/22:1)        | 12.06   | 1.17  | 43.39    | 5.77   | 27.07               | 7.92   | 17.82               | 5.72   | 23.78                | 4.88   |
| 809.6530584 | SM(d18:1/24:3)        | 11.06   | 1.27  | 41.11    | 5.06   | 24.30               | 7.09   | 14.90               | 4.91   | 23.32                | 4.98   |
| 675.543514  | <b>SM(d18:1/14:0)</b> | 4.42    | 0.61  | 30.82    | 4.71   | 18.27               | 5.59   | 9.90                | 3.97   | 14.71                | 3.25   |
| 717.5904616 | SM(d18:1/17:0)        | 6.02    | 0.73  | 27.55    | 4.04   | 16.49               | 4.97   | 9.72                | 3.84   | 14.65                | 3.10   |
| 759.6374092 | SM(d18:1/20:0)        | 3.62    | 0.48  | 17.92    | 2.46   | 10.93               | 3.33   | 6.41                | 2.47   | 10.24                | 2.09   |
| 783.6374092 | SM(d18:1/22:2)        | 2.69    | 0.46  | 13.30    | 1.60   | 8.18                | 2.45   | 4.81                | 1.77   | 8.03                 | 1.66   |
| 827.700006  | SM(d18:1/25:1)        | 3.31    | 0.51  | 13.26    | 1.84   | 8.26                | 2.41   | 5.03                | 2.03   | 7.27                 | 1.47   |
| 839.700006  | SM(d18:1/26:2)        | 2.79    | 0.57  | 13.12    | 1.70   | 7.65                | 2.31   | 4.57                | 1.86   | 6.73                 | 1.49   |
| 841.7156552 | SM(d18:1/26:1)        | 1.26    | 0.43  | 6.70     | 1.34   | 3.82                | 1.13   | 2.13                | 1.03   | 2.93                 | 0.53   |
| 797.6530584 | SM(d18:1/23:2)        | 1.09    | 0.29  | 5.77     | 1.19   | 3.55                | 1.15   | 2.03                | 0.87   | 3.04                 | 0.70   |

|             |                |      |      |      |      |      |      |      |      |      |      |
|-------------|----------------|------|------|------|------|------|------|------|------|------|------|
| 729.5904616 | SM(d18:1/18:1) | 0.40 | 0.11 | 5.06 | 0.95 | 2.61 | 0.86 | 1.42 | 0.53 | 2.19 | 0.49 |
| 829.7156552 | SM(d18:1/25:0) | 0.59 | 0.14 | 4.35 | 0.87 | 2.63 | 0.84 | 1.16 | 0.57 | 1.94 | 0.51 |
| 825.6843568 | SM(d18:1/25:2) | 0.92 | 0.34 | 4.03 | 0.92 | 2.49 | 0.81 | 1.24 | 0.55 | 1.86 | 0.36 |
| 773.6530584 | SM(d18:1/21:0) | 0.25 | 0.13 | 3.05 | 0.92 | 0.00 | 0.00 | 0.00 | 0.00 | 1.52 | 0.61 |
| 869.7469536 | SM(d18:1/28:1) | 0.00 | 0.00 | 0.00 | 0.00 | 0.00 | 0.00 | 5.79 | 2.17 | 0.00 | 0.00 |

---
